# Supplementary material
Source: ML conference proceedings conference paper supplement (https://openreview.net/forum?id=2iOOvQmJBK)
Supplement: supplementary_material [file attachment]

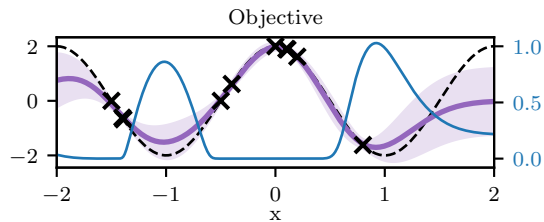

---  $f$     $\times$   $y$     $p(f | y)$    — HEI

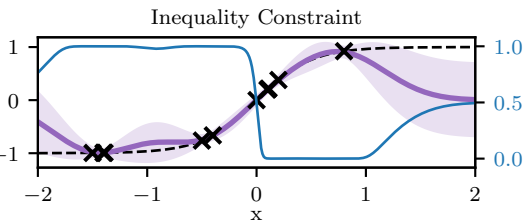

---  $g$     $\times$   $c$     $p(g | c)$    —  $P_{\text{feas}} = p(g \leq 0)$

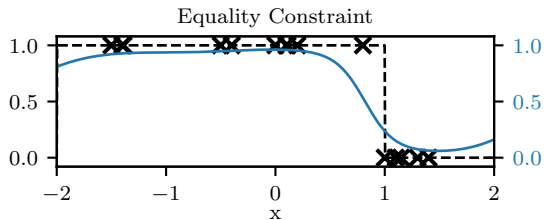

---  $h$     $\times$   $l$    —  $P_{\text{succ}} = p(h = 1 | l)$

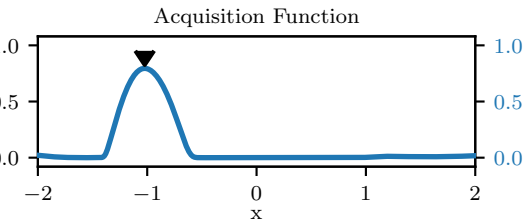

— FRCHEI =  $P_{\text{succ}} \cdot P_{\text{feas}} \cdot \text{HEI}$     $\blacktriangledown$   $x^*$
